# Supplementary material
Source: PubMed Central journal article supplement (PMC1720260)
Supplement: archdisch_90_2_182__1.pdf [file archdisch_90_2_182__1.pdf]

## Box 1 Search Criteria

|                                                         |                                                          |
|---------------------------------------------------------|----------------------------------------------------------|
| 1 child.mp.                                             | 16 (dat: adj3 bruise:).mp.                               |
| 2 child abuse.mp.                                       | 17 (bruise: adj3 child:).mp.                             |
| 3 child protection.mp.                                  | 18 (pattern: adj3 bruise:).mp.                           |
| 4 1 or 2 or 3                                           | 19 (ag: adj3 bruise:).mp.                                |
| 5 bruise:.mp.                                           | 20 (hemorrhage: adj3 bruise:).mp.                        |
| 6 contusion.mp.                                         | 21 (petechiae adj3 child abuse).mp.                      |
| 7 physical abuse.mp.                                    | 22 (ecchymoses adj3 child abuse:).mp.                    |
| 8 serial abuse.mp.                                      | 23 ((petechiae or ecchymoses) and child abuse:).mp.      |
| 9 non-accidental injury.mp.                             | 24 ((petechiae or ecchymoses) and child protection:).mp. |
| 10 non-accidental trauma.mp.                            | 25 or/15-24                                              |
| 11 (nonaccidental:and injur:).mp.                       | 26 4 and 14                                              |
| 12 (hematoma or haematoma).mp.                          | 27 25 or 26                                              |
| 13 physical punishment.mp.                              |                                                          |
| 14 or/5-13                                              |                                                          |
| 15 (battered child or shaken baby or battered baby).mp. |                                                          |

Fig 1 Ranking used for study type and abuse definitions.

| <b>Study type</b> | <b>Criteria used to define abuse</b>                                                                  | <b>Ranking</b> |
|-------------------|-------------------------------------------------------------------------------------------------------|----------------|
| Case control      | Abuse confirmed at case conference or civil or criminal court proceedings or admitted by perpetrator. | 1              |
| Cross sectional   | Abuse confirmed by stated criteria including multidisciplinary assessment                             | 2              |
| Qualitative       | Abuse defined by stated criteria                                                                      | 3              |
| Case series       | Abuse stated but no supporting detail or evidence given                                               | 4              |
|                   | Suspected abuse                                                                                       | 5              |

**Table A Summary of papers detailing bruising in non-abused children**

| Author/<br>date/<br>location          | Study population                                                                                                                               | Study type<br>and ranking       | Outcome                                                                                          | Excluded |                      |                                    | Critical appraisal                                                                                                                                                                                                                                                                                                                                                                                |
|---------------------------------------|------------------------------------------------------------------------------------------------------------------------------------------------|---------------------------------|--------------------------------------------------------------------------------------------------|----------|----------------------|------------------------------------|---------------------------------------------------------------------------------------------------------------------------------------------------------------------------------------------------------------------------------------------------------------------------------------------------------------------------------------------------------------------------------------------------|
|                                       |                                                                                                                                                |                                 |                                                                                                  | Abuse    | Neuro-<br>disability | predispo-<br>sition to<br>bruising |                                                                                                                                                                                                                                                                                                                                                                                                   |
| Sugar et al<br>1999,<br>Seattle       | 973 children attending well child clinic at 7 sites. Age: under 3 years. M:F=1:1 (ethnically and racially representative population included). | Cross sectional (2) prospective | Prevalence and distribution of bruises related to age and motor development                      | Yes      | Yes                  | Yes                                | Study focused on bruising. Large population representative of young age group studied and exposure effects. Recall bias: possible as development based on parent reporting and not validated. Observer bias: unlikely due to standard bruise recording method used. Statistical analysis to eliminate chance effect.                                                                              |
| Carpenter<br>1998<br>Darlington<br>UK | 177 babies, seen in HV hearing and child surveillance clinics in two centres. Age: 6-12 months M:F=1:1                                         | Cross sectional (2) prospective | Demography. Size and colour of bruises. Prevalence and distribution related to motor development | No       | No                   | No                                 | Study focused on bruises. Limited age range. Matching with census data revealed under representation of upper social class. Recall bias: possible as development based on parent reporting and not validated. Observer bias: unlikely due to standard bruise recording method used. Statistical analysis to eliminate chance effect. Possible confounding effect of abuse as it was not excluded. |
| Tush 1982<br>Pennsylvania<br>USA      | 30, 3 year old children attending urban day care centre. M:F=17:13                                                                             | Case series (4) prospective     | Prevalence of bruises related to demography. Distribution of bruises,.                           | No       | Yes                  | Yes                                | Study focused on bruising. Representativeness limited by small case series. Observer bias: unlikely due to standardised and validated recording method. Recall bias: minimised by validation of parent reporting of demographic and development details and researcher observation. Statistical analysis to eliminate chance effect. Possible confounding effect of abuse as it was not excluded  |
| Wedgwood<br>1990<br>Derbyshire<br>UK  | 56 children under 4 years, admitted or referred to children's hospital admission unit                                                          | Case series (4) prospective     | Distribution, of bruising related to developmental level. Number colour and size of bruises      | Yes      | No                   | Yes                                | Study focused on bruising. Small case series limits the representativeness of study. Recall bias on development assessment by parents possible. Observer bias: unlikely due to standard bruise recording method used but single researcher may introduce bias. Data presented in a way that makes                                                                                                 |

|                                          |                                                                                                                                   |                                    |                                                                                                          |     |     |     |                                                                                                                                                                                                                                                                                                                                                                                                      |
|------------------------------------------|-----------------------------------------------------------------------------------------------------------------------------------|------------------------------------|----------------------------------------------------------------------------------------------------------|-----|-----|-----|------------------------------------------------------------------------------------------------------------------------------------------------------------------------------------------------------------------------------------------------------------------------------------------------------------------------------------------------------------------------------------------------------|
|                                          |                                                                                                                                   |                                    |                                                                                                          |     |     |     | prevalence data difficult to extract. Error on figure labelling.                                                                                                                                                                                                                                                                                                                                     |
| Mortimer 1983<br>Camden and Islington UK | 620 infants under 1 year attending child health clinic or hospital follow up clinic                                               | Case series (4)<br>prospective     | Prevalence and description of size, number and distribution of bruises in 6 cases                        | No  | No  | No  | Study focused on bruising. Study detail limited as results are presented in a letter. Population limited to infants, no age break down or detail given to determine how representative the study is. However clear description of the 6 infants with bruising given. Results possibly confounded by one of the cases where abuse not adequately excluded. Methodology of bruise recording not given. |
| Lyons et al 1993.<br>Sydney Australia    | Immediate assessment of 207 children under 6 years old who fell from hospital beds or cribs                                       | Cross sectional (2)                | Distribution of injuries seen after falls from hospital beds; including contusions (bruises)             | Yes | No  | No  | Selected group of children, examined after known documented injury. Useful study looking at injury after fall from a known height. Descriptive study focussed on forces and mechanism of injury related to clinical findings collected in systematic manner. Limited bruising data                                                                                                                   |
| Labbe et al 2001,<br>Quebec Canada       | 2040 examinations of 1476 children under 17yrs old seen in medical centre over a year for reasons other than trauma. (Girls 1109) | Cross Sectional (2)<br>prospective | Prevalence, number, distribution and type of skin injury related to age. Including some data on bruising | Yes | Yes | Yes | Bruising not the main focus, only paper to address older children. Bruising data limited to age group prevalence figures. Most of the data applied to all injury types. Observer bias: standard recording method described but single observer may introduce bias.                                                                                                                                   |

**Table B Papers comparing bruising patterns in abused and non abused children.**

| <b>Author, date and place of study</b> | <b>Study population</b>                                                                                                                                                                                | <b>Study type and ranking</b> | <b>Definition of abuse and ranking</b>                                                                                         | <b>Study Outcome</b>                                                                                                                           | <b>Critical appraisal</b>                                                                                                                                                                                                                                                                                                                                                                                                                                                                                                                                |
|----------------------------------------|--------------------------------------------------------------------------------------------------------------------------------------------------------------------------------------------------------|-------------------------------|--------------------------------------------------------------------------------------------------------------------------------|------------------------------------------------------------------------------------------------------------------------------------------------|----------------------------------------------------------------------------------------------------------------------------------------------------------------------------------------------------------------------------------------------------------------------------------------------------------------------------------------------------------------------------------------------------------------------------------------------------------------------------------------------------------------------------------------------------------|
| Dunstan et al<br>2002<br>Cardiff UK    | Age:1-13 years .<br>M: F= 66:34<br><i>Cases:</i> 133 abused children examined for physical child abuse (1992-6)<br><i>Controls:</i> 189 children from ambulatory outpatients (1998-9)                  | Case control (1)              | diagnosed at case conference (1)<br><br>.....<br>controls children attending for reasons other than abuse                      | Distribution, size and number of bruises in abused and non-abused children. A scoring system for probability of abuse                          | Bruising prime focus of paper. Retrospective data collection from cases from standardised case notes. Prospective data collection from controls according to study protocol.<br>Population not representative for infants under 1 year.<br>Selection bias: possible, controls (a) not matched (b) not from same time period (c) not victims of accident (d) male predominance.<br>Measurement bias: unlikely but possible observer bias in absence of blinding to exposure.<br>Statistical analysis: eliminates chance effect<br>No obvious confounders. |
| Worlock et al<br>Nottingham UK         | Age: under 5years old<br>Sex ratio for cases and controls not significantly different<br><i>Cases:</i> 35 children non accidental fractures<br><i>controls:</i> 116 children with accidental fractures | Case control (1)              | On child protection register for confirmed physical abuse. (1)<br><br>.....<br>Abuse excluded from controls but not stated how | Pattern of fractures in abused and non-abused children with a description of the prevalence and distribution of significant associated bruises | Bruising not the main focus of the paper. Population only representative of bruising in selected group of young children with non-accidental fractures.<br>Selection bias: possible, controls not age matched or from same time period.<br>Measurement bias: possible as “significant” bruises recorded<br>Statistical analysis eliminates chance effect.<br>No obvious confounder.                                                                                                                                                                      |

**Table C Summary of papers detailing bruising in abused children**

| <b>Author/date/location</b>          | <b>population</b>                                                                                                                                      | <b>Study type and ranking</b> | <b>Definition of abuse and ranking</b>                                                                  | <b>outcome</b>                                                                                                                   | <b>Critical appraisal</b>                                                                                                                                                                                                                                                          |
|--------------------------------------|--------------------------------------------------------------------------------------------------------------------------------------------------------|-------------------------------|---------------------------------------------------------------------------------------------------------|----------------------------------------------------------------------------------------------------------------------------------|------------------------------------------------------------------------------------------------------------------------------------------------------------------------------------------------------------------------------------------------------------------------------------|
| Johnson Showers 1985 Ohio USA        | 616 children examined for suspected physical abuse. 1980-82 Age under 17 years 56% boys                                                                | Case series (4)               | Suspected physical abuse (5)                                                                            | Demographics, injury type, cause and location. Some data on bruising included                                                    | Bruising not main focus. One of largest population studies of physical child abuse. Retrospective notes based. Data from standardised data collection at assessment. Bruising data limited to prevalence figures, most statistically significant causes and sites of bruising.     |
| Galleno et al 1981, Los Angeles USA  | 66 child abuse cases seen by child abuse team Age under 17 years                                                                                       | Case series (4)               | child abuse confirmed on stated clinical and presenting criteria (3)                                    | Demography of cases Pattern and distribution of soft tissue injury                                                               | Bruising not the main focus. Population includes age group of the review but small series limits the applicability of findings to the general population. Abuse criteria used raise the possibility of reverse causality                                                           |
| de Silva S 1993 Camperdown Australia | Hospital records of 17 cases of fatal child abuse, (homicide) Age 1-3 years. 10 boys                                                                   | Case series (4)               | Cause of death homicide. Excluded if there was only suspicion of abuse (3)                              | Autopsy findings including prevalence and site of bruising                                                                       | Bruising not the main focus of the paper. Small case series of highly selected severe child abuse; deaths from head injury or strangulation in young children. Bruising data limited to short description of the prevalence, nature and site of bruising in these cases.           |
| Naidoo 2000 Cape Metropole S. Africa | Hospital records of 300, children with NAI (1992-6) with oral-facial trauma Age:under 14 years old (mean age 4.75 years) M:F=1:1. no data on ethnicity | Case series (4)               | Cases of "proven physical abuse" criteria not stated. (excluded neglect, emotional or sexual abuse) (4) | Injury type, prevalence, site on the head. Site of the crime and limited characteristics of perpetrator and disclosure of abuse. | Highly selected cases. Bruising not main focus. Retrospective notes based methodology. Single data collector, method validated by test-retest procedure. Bruising data limited to prevalence figures for bruising to head and neck and qualitative observations as to their cause. |
| McMahon et al 1995 Pittsburgh USA    | 371 children with suspected NAI seen in children's hospital 1987-90. Age 0-18 yrs                                                                      | Case series (4)               | Suspected physical abuse (5) (sexual, mental abuse and neglect excluded)                                | Prevalence type and site of soft tissue injuries including data on prevalence and numbers of bruising                            | Retrospective descriptive study based on review of hospital records and photographs. Bruising not the main focus. Bruising data included prevalence figures. Age related data given on prevalence and site of soft tissue injury but bruise specific data could not be extracted   |
| Atwel et al 1998 Sheffield UK        | Pathology records of 24 cases fatal NAHI all under 5 years                                                                                             | Case series (4)               | Fatal NAHI Diagnosed at autopsy included 5 cases where abuse admitted) 19                               | Prevalence, distribution and pathological association of external bruising in NAHI                                               | Focused on bruising patterns. Descriptive study of detailed autopsy findings. Population: study not representative of total age group under review. Bias: to young age group, fatal cases of abuse                                                                                 |

|                                               |                                                                                                                                     |                       |                                                                                                                                                 |                                                                                                                    |                                                                                                                                                                                                                                                                                                                                                    |
|-----------------------------------------------|-------------------------------------------------------------------------------------------------------------------------------------|-----------------------|-------------------------------------------------------------------------------------------------------------------------------------------------|--------------------------------------------------------------------------------------------------------------------|----------------------------------------------------------------------------------------------------------------------------------------------------------------------------------------------------------------------------------------------------------------------------------------------------------------------------------------------------|
|                                               |                                                                                                                                     |                       | ranked (4)<br>5 ranked (1)                                                                                                                      |                                                                                                                    | Measurement bias: highly unlikely due to meticulous recording. with specific injury mechanism .<br>Reverse causality unlikely due to multiple criteria of injury and presentation to define abuse in all cases.                                                                                                                                    |
| Brinkman et al<br>1979.<br>Hamburg<br>Germany | 93 cases of child abuse. Clinical detail presented for 45 cases<br>Age 0-16                                                         | Case series (4)       | Investigatory child abuse police files in Germany (3)                                                                                           | Characteristics site of skin injuries and mechanism of injury                                                      | Bruising not the main focus.<br>Population: series too small to be generally representative of whole of age range chosen.<br>Measurement bias: unlikely photographic backup.<br>Paper contains 9 photographs of bruising after clear injury description.                                                                                           |
| Sussman.<br>1968<br>San Fransisco.<br>USA     | 11 “battered Children”<br>no age range                                                                                              | Case series (4)       | Child battered by care taker/sibling (4)                                                                                                        | Characteristics of skin lesions described and photographs. Some reference to bruising                              | Early paper giving qualitative description of skin lesions in small series of physically abused children. Evidence augmented by Photographs of bruises in children with physical abuse of a known cause.                                                                                                                                           |
| Johnson et al<br>1990. Ohio<br>USA            | 94 of 944 physically abused children with hand injury 1980-82 seen by children’s hospital child abuse team.<br>Age under 19.5 years | Case series (4)       | Physical abuse diagnosed by child abuse programme teams (2)                                                                                     | Prevalence of hand injury in NAI children, related to demography. Type of injury, description of bruising of hand. | Bruising not the main focus of paper which is specific to hand injuries. Retrospective notes based study from standardised data collection. Population demographics not defined for children with bruises. Evidential value limited to description of bruises, prevalence and description of mechanism of injury in 5 cases and photograph in one. |
| Feldman<br>1992.. Seattle<br>USA              | 13 children 9:cases of vertical gluteal cleft injury<br>4 of bruising to pinna<br>Age: under 10 years                               | Small case series (4) | physical abuse confirmed on clinical and presenting features (including 4 cases of witnessed or admitted abuse)<br>9 ranked (3)<br>4 ranked (1) | Description and mechanism of two specific types of bruising injury                                                 | Two specific bruising patterns form the main focus of the paper. Not a population study.<br>Photographs and detailed case scenarios lend evidential weight to paper.                                                                                                                                                                               |
| Leavitt et al.<br>1992<br>New York .<br>USA   | 85 children admitted to hospital with diagnosis of abuse /neglect. 1987-89.                                                         | Case series (4)       | Children admitted to hosp with suspected abuse/neglect/sexual abuse (5)                                                                         | Abnormalities in head and neck                                                                                     | Retrospective notes based study. Highly selected data about head and neck injury in NAI. Bruising data limited to prevalence figures with comment on location of bruise to head and neck.                                                                                                                                                          |

|                                        |                                                                                                                                                       |                                                                                                                  |                                                                                                                                  |                                                                                                                                                                    |                                                                                                                                                                                                                                                                               |
|----------------------------------------|-------------------------------------------------------------------------------------------------------------------------------------------------------|------------------------------------------------------------------------------------------------------------------|----------------------------------------------------------------------------------------------------------------------------------|--------------------------------------------------------------------------------------------------------------------------------------------------------------------|-------------------------------------------------------------------------------------------------------------------------------------------------------------------------------------------------------------------------------------------------------------------------------|
|                                        | Age: under 16 years<br>(mean age 3.75 years)<br>M:F=1:1                                                                                               |                                                                                                                  |                                                                                                                                  |                                                                                                                                                                    |                                                                                                                                                                                                                                                                               |
| Ellerstein<br>1979 Buffalo<br>USA      | 3 children case history<br>and photograph<br>Age: two 4 year olds<br>and one 8 years.                                                                 | Review<br>article<br>including 3<br>case reports<br>(4+)                                                         | Abuse of known cause<br>(1)                                                                                                      | Photographs of<br>cutaneous injury and<br>cause                                                                                                                    | Not a population based study, bruises not the main focus of paper.<br>Strong photographic evidence of bruises in 3 case scenarios with<br>NAI of known cause.                                                                                                                 |
| Lynch A<br>1975<br>Pennsylvania<br>USA | 275 cases of abuse in<br>Metropolitan school<br>pupil population of<br>202,000 surveyed in<br>1970                                                    | Cross<br>sectional (2)                                                                                           | Suspected abuse and<br>neglect documented by<br>5 of 8 child abuse<br>committees (5)                                             | Epidemiology of abuse<br>in school population.<br>Injury type and cause                                                                                            | Bruising not the main focus or part of case control analysis.<br>Prospective study to identify the prevalence and characteristics of<br>abuse in school aged population. Study methodology subject to<br>observer and recall bias. Bruising data limited to prevalence figure |
| Smith SM,<br>Hanson R<br>1974<br>UK    | 134 children admitted to<br>hospital as “battered “<br>children and 53 controls,<br>children admitted with<br>other conditions.<br>Age; under 5 years | Case control<br>study that<br>included a<br>case series<br>(4) with data<br>on injuries<br>in abused<br>children | Cases: Abuse<br>diagnosed in hospital<br>(4)<br><br>Controls<br>Children admitted to<br>hospital for cause other<br>than trauma. | Description of injury<br>type and severity in<br>abused group. Case<br>control comparison of<br>related psycho social<br>risk factors and<br>developmental status. | Bruising not the main focus of the paper. Population preschool<br>children. A prospective control study but no matched data presented<br>regarding bruising. Bruising data limited to description of prevalence<br>and commonest site.                                        |
